# Supplementary material for: Kinematic Parameters That Can Discriminate in Levels of Functionality in the Six-Minute Walk Test in Patients with Heart Failure with a Preserved Ejection Fraction
Source: MDPI journal article supplement (doi:10.3390/jcm12010241), 2022-12-28
Supplement: s1 [file s1]

**Supplementary Table S2:** Descriptive kinematic parameters of the complete sample.

|                                                                   | <b>Mean (SD)</b> | <b>Min-Max</b> |
|-------------------------------------------------------------------|------------------|----------------|
| <b>6MWT (m)</b>                                                   | 246.21 (93.33)   | 105-540        |
| <b>Lap time (s)</b>                                               | 50.64 (19.95)    | 20.00-102.86   |
| <b>Gait speed (m/s)</b>                                           | 0.68 (0.26)      | 0.29-1.50      |
| <b>Steps (n)</b>                                                  | 537.94 (105.95)  | 298.00-716.00  |
| <b>Step time (s)</b>                                              | 0.36 (0.12)      | 0.25-0.76      |
| <b>Step length (m)</b>                                            | 0.24 (0.08)      | 0.09-0.59      |
| <b>Step velocity (m/s)</b>                                        | 0.70 (0.25)      | 0.33-1.50      |
| <b>Step cadence (steps/min)</b>                                   | 89.66 (17.66)    | 49.67-119.33   |
| <b>Step symmetry ratio</b><br>(step time max/step time min)       | 23.67 (24.32)    | 2.56-106.72    |
| <b>Strides (n)</b>                                                | 267.41 (63.32)   | 120.10-365.17  |
| <b>Stride time (s)</b>                                            | 0.73 (0.23)      | 0.49-1.51      |
| <b>Stride length (m)</b>                                          | 1.09 (0.59)      | 0.29-2.95      |
| <b>Stride velocity (m/s)</b>                                      | 1.80 (1.27)      | 0.22-5.80      |
| <b>Stride cadence (strides/min)</b>                               | 89.14 (21.11)    | 40.03-121.72   |
| <b>Stride symmetry ratio</b><br>(stride time max/stride time min) | 10.97 (10.34)    | 1.69-47.40     |
| <b>n (Percentage)</b>                                             |                  |                |
| <b>6MWT</b>                                                       |                  |                |
| <300m                                                             | 48 (68.60%)      |                |
| >300m                                                             | 22 (31.40%)      |                |
| <b>STOP during the 6MWT and Reason</b>                            |                  |                |
| Yes                                                               | 29 (41.40%)      |                |
| No                                                                | 41 (58.60%)      |                |
| Intolerant Dyspnea                                                | 18 (62.10%)      |                |
| Leg Fatigue or Leg Pain                                           | 10 (34.50%)      |                |
| SpO2 Drop                                                         | 1 (3.40%)        |                |

**NYHA:** New York Heart Association class; **SD:** Standard Deviation; **6MWT:** 6-Minute Walk Test; **HR:** Heart Rate; **SpO2:** Oxygen Saturation.
