# Supplementary material for: Kinematic Parameters That Can Discriminate in Levels of Functionality in the Six-Minute Walk Test in Patients with Heart Failure with a Preserved Ejection Fraction
Source: MDPI journal article supplement (doi:10.3390/jcm12010241), 2022-12-28

**Supplementary Figure S1.** Interface for processing the data extracted with the sensor for the gait kinematic analysis with the MATLAB software.

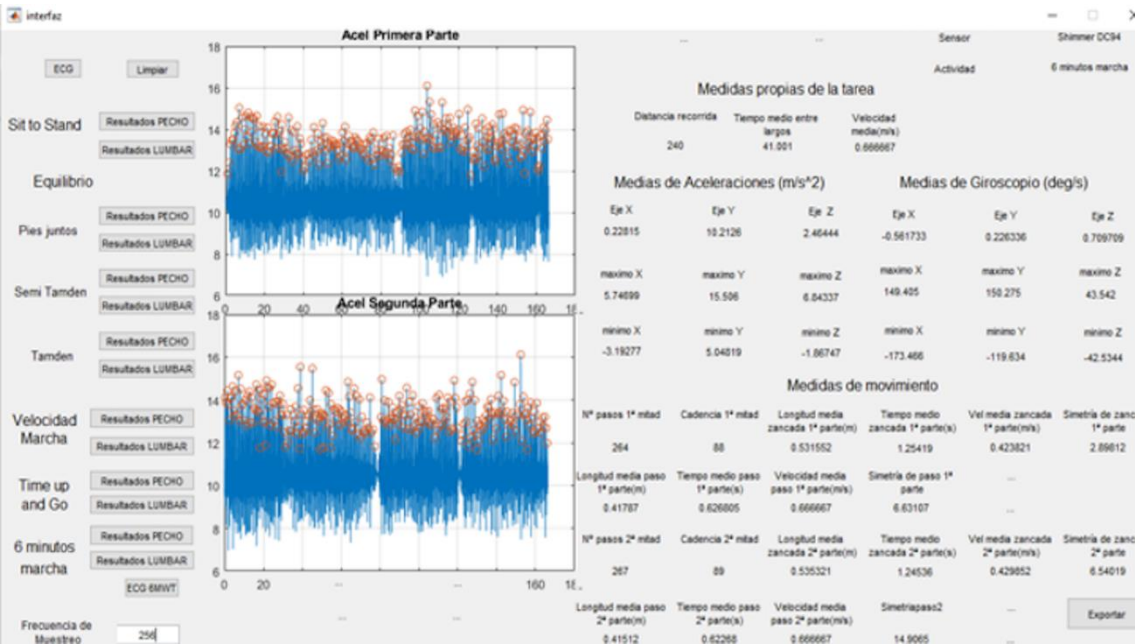

Supplement: s1 [file s1]
