# Supplementary material for: Kinematic Parameters That Can Discriminate in Levels of Functionality in the Six-Minute Walk Test in Patients with Heart Failure with a Preserved Ejection Fraction
Source: MDPI journal article supplement (doi:10.3390/jcm12010241), 2022-12-28
Supplement: s1 [file s1]

**Supplementary Table S1.** Participants' descriptive, anthropometric and clinical variables, as well as blood and urinary biomarkers (n=70).

|                                        | Mean (SD)         | Min-Max      |
|----------------------------------------|-------------------|--------------|
| Age (years)                            | 80.74 (6.11)      | 70.0-96.0    |
| LVEF (%)                               | 60.71 (4.48)      | 50.0-75.0    |
| Comorbidities (n)                      | 8.34 (1.92)       | 4.0-14.0     |
| Height (m)                             | 1.61 (0.08)       | 1.43-1.84    |
| Weight (kg)                            | 76.89 (15.11)     | 52.0-116.50  |
| BMI (kg/m <sup>2</sup> )               | 29.79 (6.04)      | 19.81-51.78  |
| Polypharmacy (n)                       | 10.09 (3.14)      | 3.0-19.0     |
| <b>Blood Biomarkers</b>                |                   |              |
| Hb (g/dL)                              | 14.08 (11.55)     | 6.40-108.0   |
| MCV (fL)                               | 95.43 (19.42)     | 72-247       |
| Leukocytes Count (x10 <sup>9</sup> /L) | 8.10 (5.02)       | 2.41-45.20   |
| Blood Platelets (x10 <sup>9</sup> /L)  | 217.40 (68.36)    | 8-415        |
| Glucose (mg/dL)                        | 102.09 (27.71)    | 61-195       |
| Creatinine (mg/dL)                     | 1.30 (0.60)       | 0.51-4.61    |
| GF (mL/min/1.73 m <sup>2</sup> )       | 51.37 (20.23)     | 11-90        |
| Na <sup>+</sup> (mEq/L)                | 139.91 (3.53)     | 124-148      |
| K <sup>+</sup> (mEq/L)                 | 4.63 (0.50)       | 3.5-6.2      |
| Cl <sup>-</sup> (mEq/L)                | 101.41 (4.19)     | 89-111       |
| Glycosylated hemoglobin (%)            | 6.32 (1.15)       | 4.8-10.4     |
| Ferritin (ng/mL)                       | 122.40 (138.89)   | 10-738       |
| Transferrin Saturation (%)             | 21.06 (24.90)     | 5-214        |
| Total Cholesterol (mg/dL)              | 162.31 (41.47)    | 98-317       |
| LDL (mg/dL)                            | 87.49 (29.12)     | 41-167       |
| HDL (mg/dL)                            | 46.43 (13.28)     | 28-90        |
| NT-proBNP (pg/mL)                      | 2095.99 (3354.52) | 42-19118     |
| Vitamin D (ng/mL)                      | 23.83 (10.17)     | 7-50         |
| Vitamin B12 (pg/mL)                    | 498.02 (665.53)   | 103-4668     |
| ALT (U/L)                              | 22.60 (13.55)     | 8-94         |
| CA-125 Antigen (U/mL)                  | 43.92 (75.76)     | 0-525        |
| Folic Acid (ng/mL)                     | 8.06 (2.63)       | 3-16         |
| Thyrotropin (μIU /mL)                  | 2.46 (1.84)       | 0.1-12       |
| Albumin (g/dL)                         | 4.03 (4.02)       | 2.30-36      |
| Bilirubin (mg/dL)                      | 0.61 (0.33)       | 0.1-1.8      |
| <b>Urinary Biomarkers</b>              |                   |              |
| Urine Creatinine (mg/dL)               | 77.18 (34.60)     | 24.00-158.53 |

| n (Percentage)                        |             |
|---------------------------------------|-------------|
| <b>Drugs</b>                          |             |
| ACE inhibitors                        | 16 (22.90%) |
| ARB                                   | 46 (65.70%) |
| Beta-Blockers                         | 53 (75.70%) |
| Sacubutril-Valsartan                  | 0 (0%)      |
| Ivabradine                            | 3 (4.30%)   |
| Ca-antagonists                        | 19 (27.10%) |
| Loop Diuretics                        | 60 (85.70%) |
| Mineralocorticoid Receptor Antagonist | 21 (30.00%) |
| Thiazide                              | 10 (14.30%) |
| Nitrates                              | 19 (27.10%) |
| Acarboxyprothrombin                   | 13 (18.60%) |
| Factor Xa Inhibitors                  | 29 (41.40%) |
| Acetylsalicylic acid                  | 22 (31.40%) |
| Hypoglycemic Agents                   | 33 (47.10%) |
| Metformin                             | 17 (24.30%) |
| SGT2I                                 | 9 (12.90%)  |
| GLP1                                  | 2 (2.90%)   |
| DPP4                                  | 16 (22.90%) |
| Insulin                               | 16 (22.90%) |
| <b>Comorbidities</b>                  |             |
| Arterial Hypertension                 | 68 (97.10%) |
| DM                                    | 38 (54.30%) |
| Dyslipidemias                         | 62 (88.60%) |
| Atrial Fibrillation                   | 42 (60.00%) |
| COPD                                  | 19 (27.10%) |
| Stroke                                | 10 (14.30%) |
| CRI                                   | 44 (62.90%) |
| OSA                                   | 14 (20.00%) |
| Cognitive Impairment                  | 8 (11.40%)  |
| Anemia                                | 31 (44.30%) |
| PAD                                   | 4 (5.70%)   |
| Depression                            | 24 (34.30%) |
| Cancer Disease                        | 10 (14.30%) |
| LVH                                   | 38 (54.30%) |

|                                         |             |
|-----------------------------------------|-------------|
| LVD                                     | 65 (92.90%) |
| LAD                                     | 33 (47.10%) |
| Heart Valve Disease                     | 45 (64.30%) |
| Aortic Valve Disease                    | 22 (31.40%) |
| Mitral Valve Disease                    | 32 (45.70%) |
| Tricuspid Valve Disease                 | 17 (24.30%) |
| Pulmonary Hypertension                  | 13 (18.60%) |
| <b>BMI</b>                              |             |
| Underweight                             | 0 (0.0%)    |
| Normal Weight                           | 15 (21.40%) |
| Overweight                              | 28 (40.00%) |
| Obesity                                 | 27 (38.60%) |
| <b>NYHA</b>                             |             |
| II                                      | 48 (68.60%) |
| III                                     | 22 (31.40%) |
| <b>Gender</b>                           |             |
| female                                  | 41 (58.60%) |
| male                                    | 29 (41.40%) |
| <b>History of Smoking</b>               |             |
| No                                      | 46 (65.70%) |
| Yes                                     | 24 (34.30%) |
| <b>History of Alcohol</b>               |             |
| No                                      | 64 (91.40%) |
| Yes                                     | 6 (8.60%)   |
| <b>Number of falls in the last year</b> |             |
| 0                                       | 31 (44.30%) |
| 1                                       | 19 (27.10%) |
| 2                                       | 8 (11.40%)  |
| 3                                       | 7 (10.00%)  |
| > 3                                     | 5 (7.10%)   |
| <b>Marital Status</b>                   |             |
| Single                                  | 6 (8.60%)   |
| Married                                 | 26 (37.10%) |
| Divorced                                | 1 (1.40%)   |
| Widower                                 | 37 (52.90%) |
| <b>Academic Degree/Studies Level</b>    |             |
| Not knowing how to read or write        | 10 (14.30%) |

---

|                   |             |
|-------------------|-------------|
| Literacy          | 33 (47.10%) |
| Primary studies   | 12 (17.10%) |
| Secondary studies | 5 (7.10%)   |
| Higher education  | 10 (14.30%) |

---

**LVEF:** Left Ventricular Ejection Fraction; **BMI:** Body Mass Index; **Hb:** Hemoglobin; **MCV:** Mean Corpuscular Volume; **GF:** Glomerular Filtering; **Na<sup>+</sup>:** Sodium; **K<sup>+</sup>:** Potassium; **Cl<sup>-</sup>:** Chlorine; **LDL:** Low-Density Lipoproteins Cholesterol; **HDL:** High-Density Lipoproteins Cholesterol; **NT-proBNP:** pro-Brain Natriuretic Peptide; **ALT:** Alanine Aminotransferase; **CA-125 Antigen:** Carbohydrate Antigen; **ACE inhibitors:** Angiotensin-Converting Enzyme Inhibitors; **ARB:** Angiotensin II Receptor Blocker; **SGT2I:** Sodium-Glucose Transporter 2 Inhibitors; **GLP1:** Glucagon-Like Peptide 1; **DPP4:** DiPeptidyl Peptidase-4; **DM:** Diabetes Mellitus; **COPD:** Chronic Obstructive Pulmonary Disease; **CRI:** Chronic Renal Insufficiency; **OSA:** Obstructive Sleep Apnea; **PAD:** Peripheral Arterial Disease; **LVH:** Left Ventricular Hypertrophy; **LVD:** Left Ventricular Dilatation; **LAD:** Left Atrial Dilatation; **NYHA:** New York Heart Association class; **SD:** Standard Deviation.

---
